# Supplementary material
Source: Springer Nature journal article supplement (https://www.springermedizin.de/resource/supplementary/13550_2011_36_MOESM4_ESM.pdf/9687496)

A

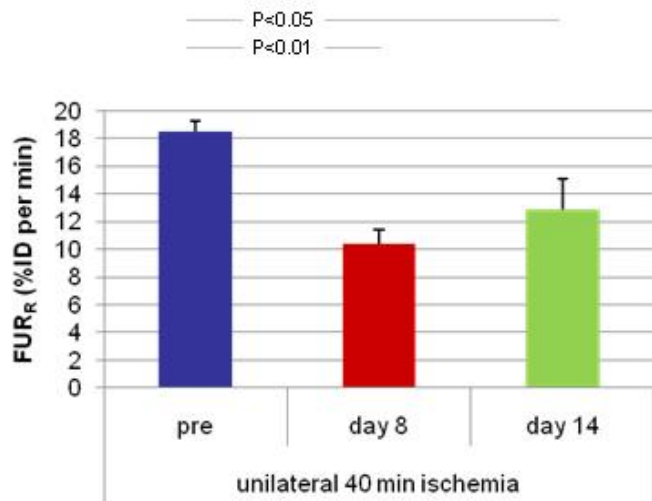

C

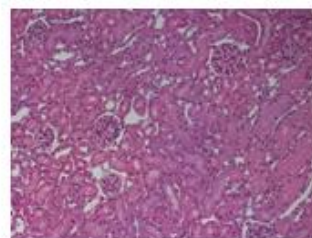

Scid beige 40 min  
ischemia

B

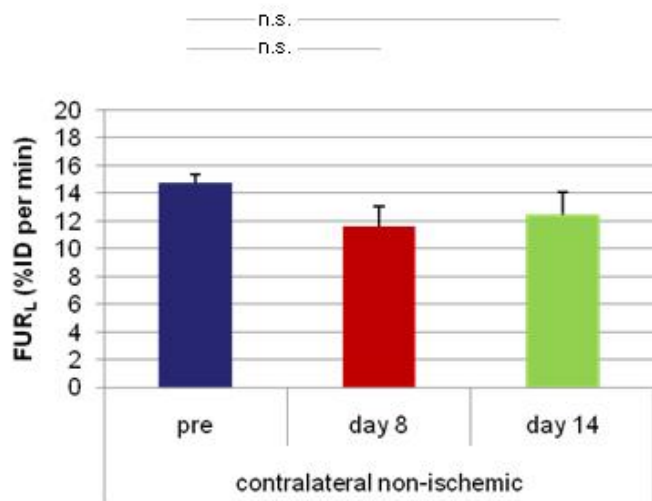

D

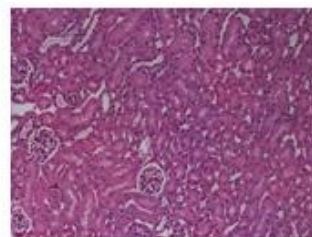

Scid beige  
non-ischemic

Supplement: MOESM4 [file 9687496]
